# Supplementary material for: Straightforward and selective metal capture through CO2-induced self-assembly
Source: Royal Society of Chemistry journal article supplement (doi:10.1039/c6gc02442d), 2016-01-01
Supplement: c6gc02442d1.pdf [file c6gc02442d1.pdf]

## Supporting Information

for

### Straightforward and selective metal capture through CO<sub>2</sub>-induced self-assembling

Guillaume Poisson,<sup>ab</sup> G. Germain,<sup>a</sup> J. Septavaux,<sup>a</sup> Julien Leclaire,<sup>\*ab</sup>

#### Content

|                                                                      |           |
|----------------------------------------------------------------------|-----------|
| <b>1. General methods .....</b>                                      | <b>2</b>  |
| <b>1.1. Solvents .....</b>                                           | <b>2</b>  |
| <b>1.2. Synthesis .....</b>                                          | <b>2</b>  |
| 1.2.1. Metal salts.....                                              | 2         |
| 1.2.2. CO <sub>2</sub> -based organometallic materials .....         | 3         |
| 1.2.3. Metal release through CO <sub>2</sub> -departure .....        | 3         |
| <b>1.3. Nuclear Magnetic Resonance .....</b>                         | <b>3</b>  |
| <b>1.4. Volumetric analysis.....</b>                                 | <b>4</b>  |
| <b>1.5. ICP-OES analysis.....</b>                                    | <b>4</b>  |
| <b>1.6. UV-Vis analysis.....</b>                                     | <b>4</b>  |
| <b>2. Individual datasets .....</b>                                  | <b>5</b>  |
| <b>2.1. NMR of sub-systems II .....</b>                              | <b>5</b>  |
| 2.1.1. 2.5 M in D <sub>2</sub> O .....                               | 5         |
| 2.1.2. 0.5 M in D <sub>2</sub> O .....                               | 9         |
| 2.1.3. 0.5 M in CD <sub>3</sub> OD .....                             | 13        |
| <b>2.2. Constituent analyses of systems III .....</b>                | <b>16</b> |
| 2.2.1. Monometal systems.....                                        | 16        |
| 2.2.1.1. Influence of the metal .....                                | 16        |
| 2.2.1.2. Influence of the initial stoichiometry x <sub>0</sub> ..... | 18        |
| 2.2.1.3. Influence of the initial concentration c <sub>0</sub> ..... | 19        |
| 2.2.2. Bimetallic systems .....                                      | 20        |
| <b>References .....</b>                                              | <b>21</b> |

## 1. General methods

### 1.1. Solvents

All solvents were purified by standard procedures or obtained from a Solvent Purification System (Braun SPS 800).

### 1.2. Synthesis

#### 1.2.1. Metal salts

4-Fluorophenol (99%), Ba(OH)<sub>2</sub> (95%), BaCl<sub>2</sub> (99%), CH<sub>3</sub>OH (99,6%), Cs<sub>2</sub>CO<sub>3</sub> (99%), Cu(CH<sub>3</sub>CO<sub>2</sub>)<sub>2</sub>·H<sub>2</sub>O (98%), D<sub>2</sub>SO<sub>4</sub> (99,5%), Diethylenetriamine (99%), FeCl<sub>3</sub>·6H<sub>2</sub>O (98%), In<sub>2</sub>O<sub>3</sub> (99%), MgCl<sub>2</sub> (99%), Na<sub>2</sub>CO<sub>3</sub> (99%), Nd<sub>2</sub>O<sub>3</sub> (99,9%), SrCl<sub>2</sub>·6H<sub>2</sub>O (99%), ZnO (99%) were purchased from Sigma-Aldrich. Mg(CH<sub>3</sub>CO<sub>2</sub>)·4H<sub>2</sub>O (99%), Ni(CH<sub>3</sub>CO<sub>2</sub>)·4H<sub>2</sub>O (98%), PdCl<sub>2</sub> (99,9%), were obtained from Strem Chemicals. EtOH (99,98%) was purchased from VWR. CoCl<sub>2</sub> (97%) was purchased from Acros. CO<sub>2</sub> (99,95%) was obtained from Air Liquid. Dy<sub>2</sub>O<sub>3</sub> (99,9%), Eu<sub>2</sub>O<sub>3</sub> (99,9%), K(CF<sub>3</sub>CO<sub>2</sub>) (98%), Li(CF<sub>3</sub>CO<sub>2</sub>) (97%), Pd(CF<sub>3</sub>CO<sub>2</sub>)<sub>2</sub> (97%), Pr<sub>2</sub>(CO<sub>3</sub>)<sub>3</sub> (99,9%), Sm<sub>2</sub>O<sub>3</sub> (99,9%), Tb<sub>2</sub>(CO<sub>3</sub>)<sub>3</sub> (99,9%) were purchased from Alfa Aesar. CD<sub>3</sub>OD (99,8%) and D<sub>2</sub>O (99,9%) were purchased from Eurisotop. Ca(OH)<sub>2</sub> (96%) and CuCl<sub>2</sub>·2H<sub>2</sub>O (99%) was obtained from Merck. CaCl<sub>2</sub> (94%) was purchased from Prolabo. K<sub>2</sub>CO<sub>3</sub> (99%) was purchased from Riedel-de Haen.

Otherwise stated, trifluoroacetate salts were obtained following the procedure described for lanthanide trifluoroacetate synthesis [1]. Pr(CF<sub>3</sub>CO<sub>2</sub>)<sub>3</sub>, Nd(CF<sub>3</sub>CO<sub>2</sub>)<sub>3</sub>, Sm(CF<sub>3</sub>CO<sub>2</sub>)<sub>3</sub>, Eu(CF<sub>3</sub>CO<sub>2</sub>)<sub>3</sub>, Tb(CF<sub>3</sub>CO<sub>2</sub>)<sub>3</sub>, Dy(CF<sub>3</sub>CO<sub>2</sub>)<sub>3</sub>, Y(CF<sub>3</sub>CO<sub>2</sub>)<sub>3</sub>, Zn(CF<sub>3</sub>CO<sub>2</sub>)<sub>2</sub> were obtained from metal oxide. Ca(CF<sub>3</sub>CO<sub>2</sub>)<sub>2</sub>, Ba(CF<sub>3</sub>CO<sub>2</sub>)<sub>3</sub>, In(CF<sub>3</sub>CO<sub>2</sub>)<sub>3</sub> were synthesized from metal hydroxide. Na(CF<sub>3</sub>CO<sub>2</sub>) was obtained from sodium carbonate. In(OH)<sub>3</sub> was synthesized using the following procedure. An excess of an aqueous solution of nitric acid 68%wt (20mL) was added to a suspension of In<sub>2</sub>O<sub>3</sub> (1g, 3,6 mmol) in 5 mL of water. The mixture was refluxed until complete dissolution. Water and remaining acid were removed under reduced pressure. The resulting yellow oil was then dissolved in 5 mL of water and an excess of an aqueous solution 0.5M of KOH was added. Spontaneous precipitation of In(OH)<sub>3</sub> occurred. The solid was filtered and wash 4 times with 20mL of water and dried at 70°C under reduced pressure. In(OH)<sub>3</sub> can

be used for the preparation of  $\text{In}(\text{CF}_3\text{CO}_2)_3$  following the procedure reported for lanthanides.  $\text{Fe}(\text{CF}_3\text{CO}_2)_3$  was synthesized using procedure described by Iranpoor *et al.* [2].  $\text{Co}(\text{CF}_3\text{CO}_2)_2$  salt was obtained using the procedure described by Shap *et al.* [3].

### 1.2.2. $\text{CO}_2$ -based organometallic materials

A 0.5 M solution of diethylenetriamine (540  $\mu\text{L}$ ; 5.0 mmol) in MeOH (10 mL) is added to a trifluoroacetate metal salt (0.416 mmol; 201.4 mg of  $\text{Nd}(\text{O}_2\text{C}_2\text{F}_3)_3$ ; 200.0 mg of  $\text{Pr}(\text{O}_2\text{C}_2\text{F}_3)_3$ ; 204.6 mg of  $\text{Eu}(\text{O}_2\text{C}_2\text{F}_3)_3$ ; 207.5 mg of  $\text{Tb}(\text{O}_2\text{C}_2\text{F}_3)_3$ ; 203.9 mg of  $\text{Sm}(\text{O}_2\text{C}_2\text{F}_3)_3$ ; 209.0 mg of  $\text{Dy}(\text{O}_2\text{C}_2\text{F}_3)_3$ ; 82.3 mg of  $\text{Fe}(\text{O}_2\text{C}_2\text{F}_3)_3$  (0.21 mmol) and 100.5 mg of  $\text{Nd}(\text{O}_2\text{C}_2\text{F}_3)_3$  (0.21 mmol); 59.4 mg of  $\text{Co}(\text{O}_2\text{C}_2\text{F}_3)_2$  (0.21 mmol) and 102.0 mg of  $\text{Sm}(\text{O}_2\text{C}_2\text{F}_3)_3$  (0.21 mmol)) in a round-bottom flask. The resulting clear solution is purged with  $\text{CO}_2$ , refluxed for an hour then cooled down to room temperature under  $\text{CO}_2$  atmosphere overnight. The suspension is then centrifuged and the supernatant removed. The solid washed with 2\*10 mL of MeOH, centrifuged and dry under vacuum. Supernatants are gathered and solvent evaporated under reduced pressure. Each sample is produced in triplicate before analysis.

### 1.2.3. Metal release through $\text{CO}_2$ -departure

Following a typical capturing step as described previously ( $c_0 = 0.5 \text{ M}$ ,  $x_0 = 1/12$ ), the solid material collected is re-suspended into 10 mL of MeOH.  $(1-E_s(X)) \cdot n_0$  moles of TFA and  $(1-E_s(\text{DETA})) \cdot n_0$  moles of DETA are then added and the mixture is refluxed under a gentle flux of nitrogen until a clear solution is obtained.

## 1.3. Nuclear Magnetic Resonance

For subsystems **II**, liquid state NMR spectra were recorded in, methanol- $d_4$ , heavy water on spectrometers operating at 500 MHz (BBFO and BBI probes with z gradients) respectively for  $^1\text{H}$  and  $^{13}\text{C}$ . Solvent residual signals were used as internal standard (when necessary, water suppression by presaturation was used). 2s relaxation time allowed proton full relaxation.  $^{13}\text{C}$  spectra were recorded using a 30 degrees tilt angle and 2s relaxation time. HSQC experiments were run either in full or reduced spectral window ( $\text{SW} = 3.1\text{-}2.1 \text{ ppm}$  for  $^1\text{H}$  and 50-34 ppm for  $^{13}\text{C}$ ) to optimize the resolution, following reported procedure [4].

For systems **III**,  $^1\text{H}$  and  $^{19}\text{F}$  NMR spectra were recorded on a Bruker Advance 300 spectrometer, operating at a frequency of 300 MHz. The samples were prepared by dissolving 5-10mg of the solid residue in a 1mL vial with 650 $\mu\text{L}$  of a 95/5 (v/v)  $\text{D}_2\text{O}/\text{D}_2\text{SO}_4$  solution containing 0.06 mol.L $^{-1}$  4-fluorophenol as an internal standard and sonicated for 3 h at 50°C, then transferred into a NMR tube for 1D standard analysis. 16s relaxation time allowed proton and fluorine full relaxation.

#### **1.4. Volumetric analysis**

Analysis were performed with a home-made Chittick Apparatus at 0°C in an ice bath. Calibration was conducted with  $\text{K}_2\text{CO}_3$  to relate the volume measured to the molar content in carbon dioxide. In a typical experiment, 30mg of solid material were digested by adding under vigorous stirring an excess (1mL) of a 1M  $\text{H}_2\text{SO}_4$  solution.

#### **1.5. ICP-OES analysis**

ICP-OES analysis were recorded on a Varian ICP-OES 710ES. The samples were prepared by dissolving 30 mg of solid or supernatant residue in an aqueous solution of  $\text{HNO}_3$  69%wt for standard acid digestion. Each solution was then precisely diluted in order to reach the successive estimated concentrations of 100, 200 and 400 ppb of metal. All samples were analyzed at 3 different wavelengths in triplicate mode.

#### **1.6. UV-Vis analysis**

UV-Vis spectra were recorded on a Shimadzu UV-2401 PC spectrophotometer. The samples were prepared by dissolving 15mg of solid residue in an aqueous solution of  $\text{HCl}$  5%wt. The solution was then precisely diluted to reach levels of absorbance at the working wavelength where the Beer Lambert law is valid.  $\text{Nd}^{3+}$  was quantified at  $\lambda = 794$  nm,  $\text{Dy}^{3+}$  was quantified at  $\lambda = 806$  nm and  $\text{Fe}^{3+}$  at  $\lambda = 334.5$  nm. As  $\text{Nd}^{3+}$  also absorbs around 334.5 nm, a cross-calibration was required to reliably determine the concentration in  $\text{Fe}^{3+}$ .

## 2. Individual datasets

### 2.1. NMR of sub-systems II

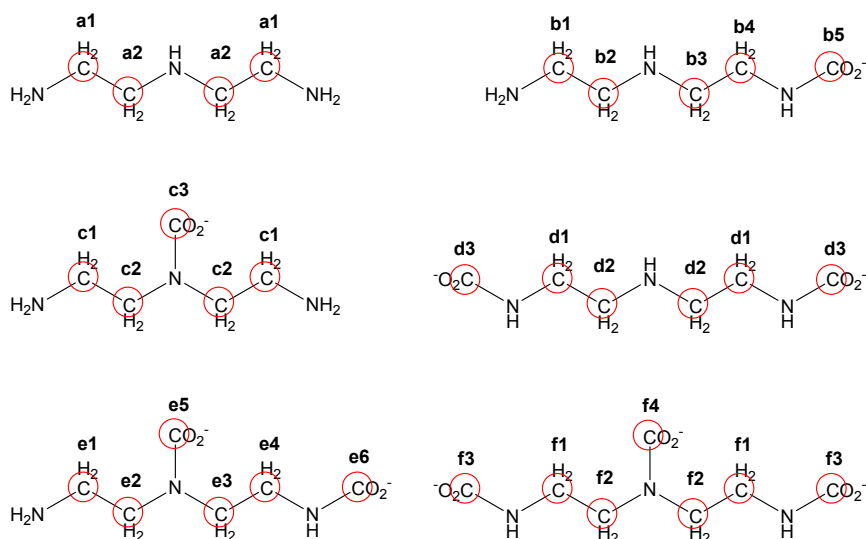

#### 2.1.1. 2.5 M in D<sub>2</sub>O

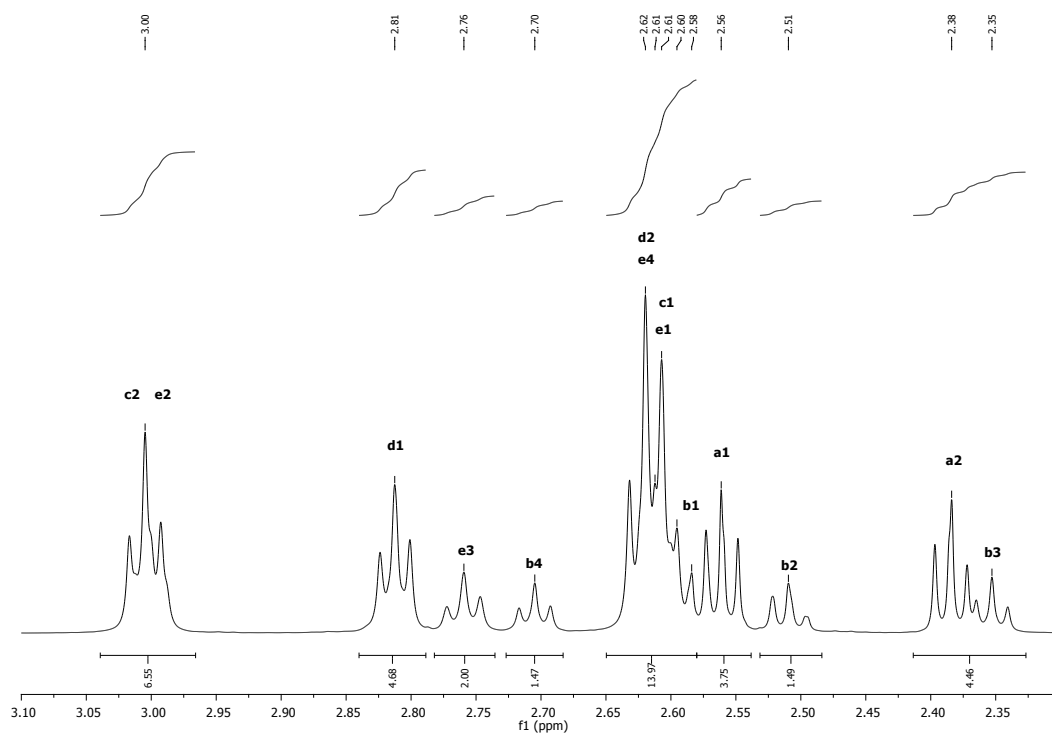

**Figure S1:** <sup>1</sup>H NMR spectrum of a 2.5 M solution of DETA in D<sub>2</sub>O purged with CO<sub>2</sub>, refluxed for an hour then cooled down to room temperature under CO<sub>2</sub> atmosphere overnight.

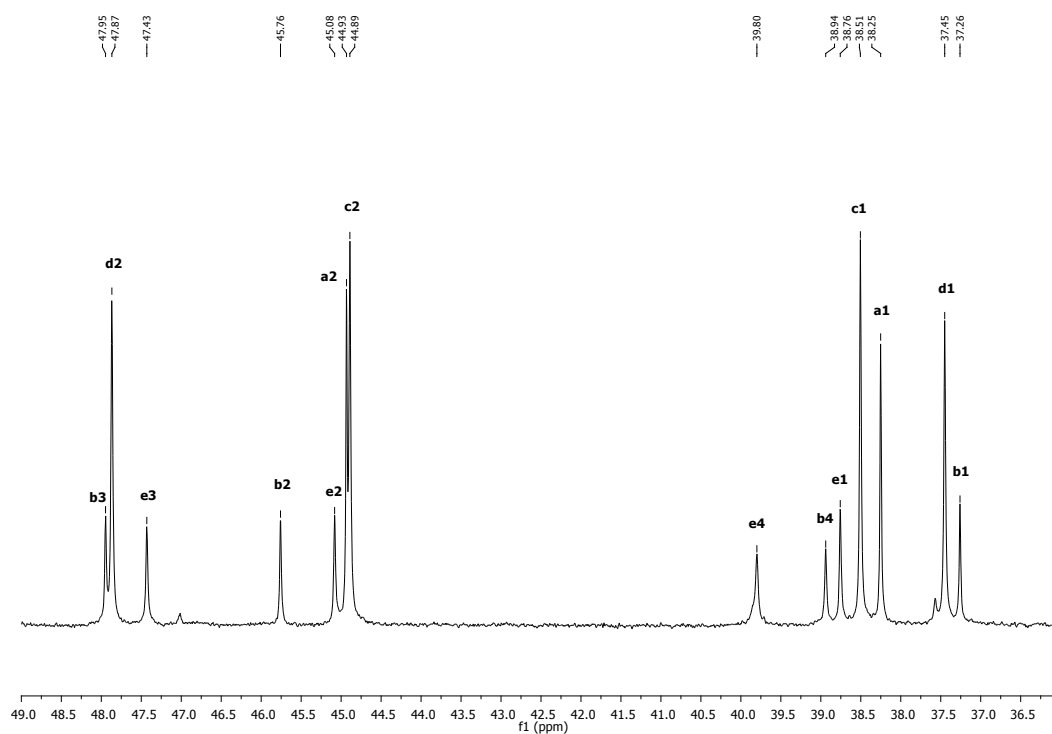

**Figure S2:** High field  $^{13}\text{C}$  NMR spectrum of a 2.5 M solution of DETA in  $\text{D}_2\text{O}$  purged with  $\text{CO}_2$ , refluxed for an hour then cooled down to room temperature under  $\text{CO}_2$  atmosphere

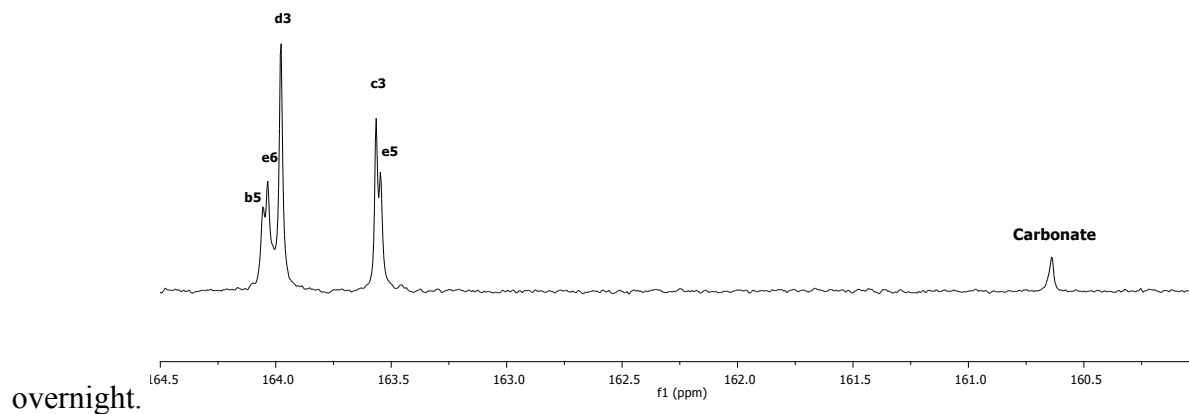

**Figure S3:** Low field  $^{13}\text{C}$  NMR spectrum of a 2.5 M solution of DETA in  $\text{D}_2\text{O}$  purged with  $\text{CO}_2$ , refluxed for an hour then cooled down to room temperature under  $\text{CO}_2$  atmosphere overnight.

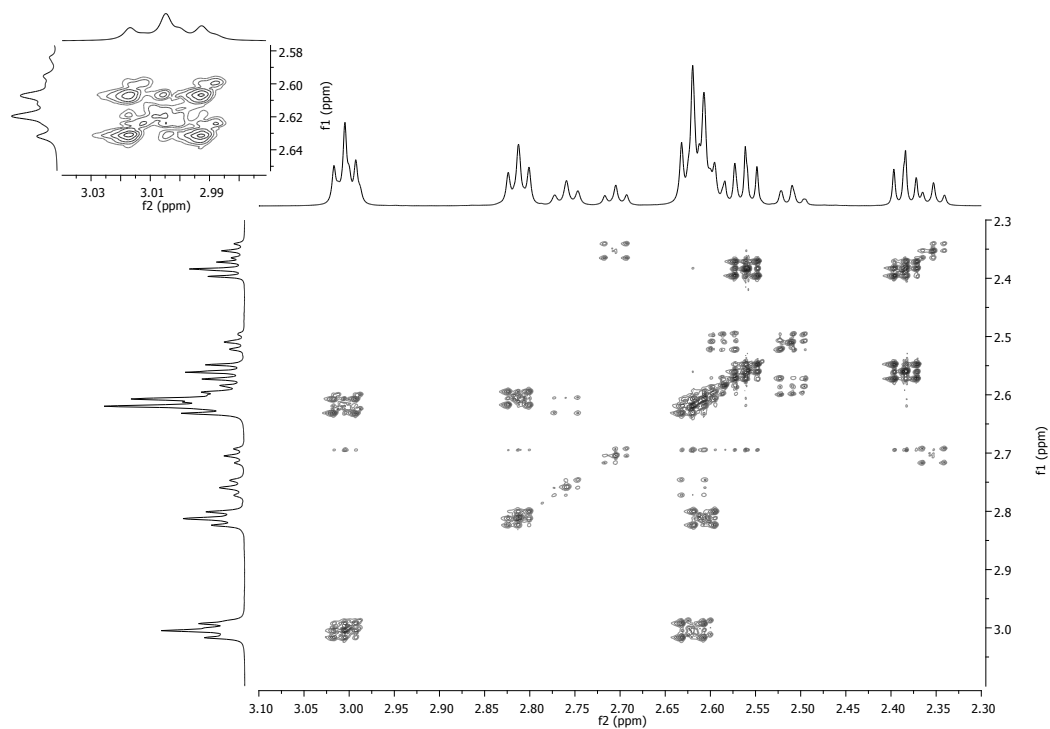

**Figure S3:** COSY NMR spectrum of a 2.5 M solution of DETA in D<sub>2</sub>O purged with CO<sub>2</sub>, refluxed for an hour then cooled down to room temperature under CO<sub>2</sub> atmosphere overnight.

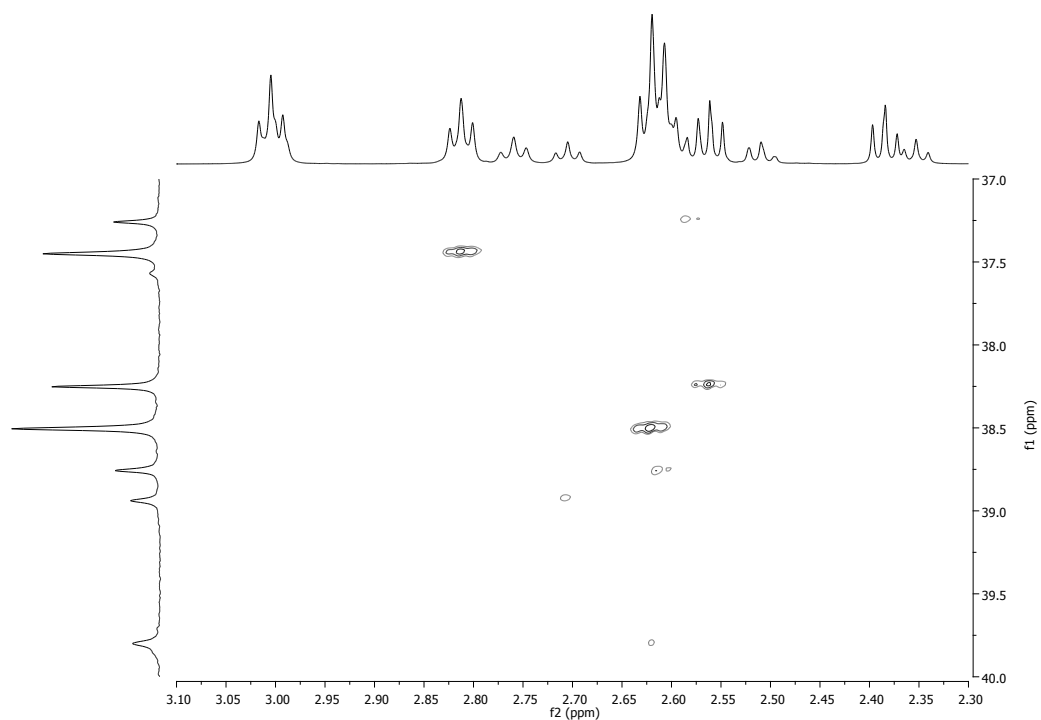

**Figure S4:** Partial view of the HSQC NMR spectrum of a 2.5 M solution of DETA in D<sub>2</sub>O purged with CO<sub>2</sub>, refluxed for an hour then cooled down to room temperature under CO<sub>2</sub>

atmosphere

overnight.

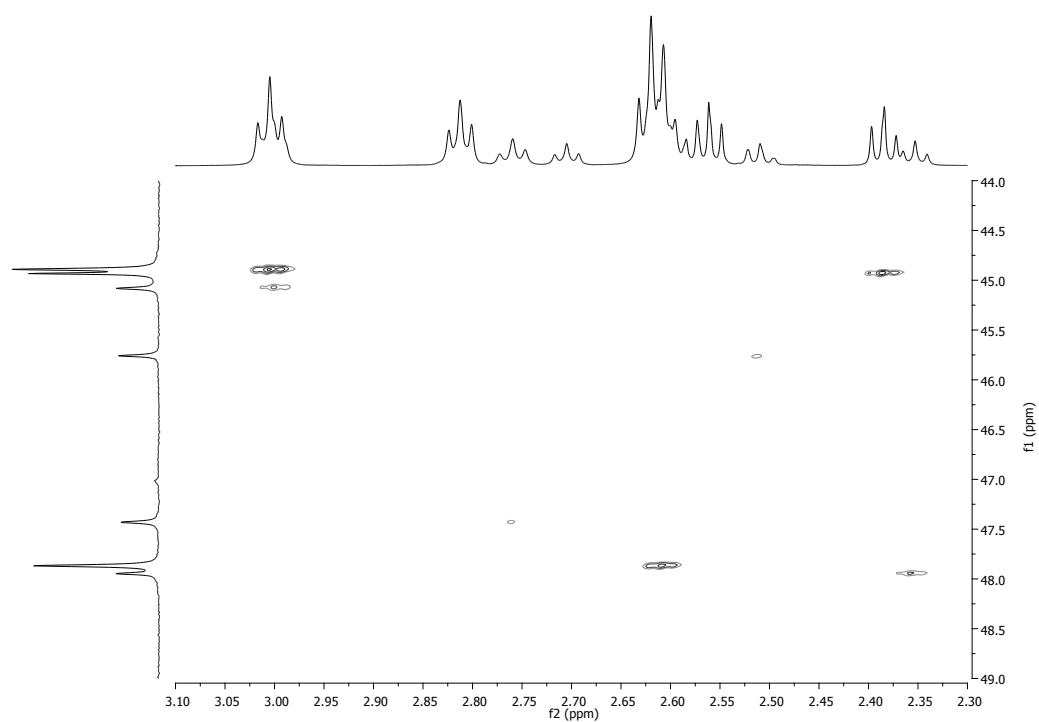

**Figure S5:** Partial view of the HSQC NMR spectrum of a 2.5 M solution of DETA in D<sub>2</sub>O  
purged with CO<sub>2</sub>, refluxed for an hour then cooled down to room temperature under CO<sub>2</sub>  
atmosphere overnight.

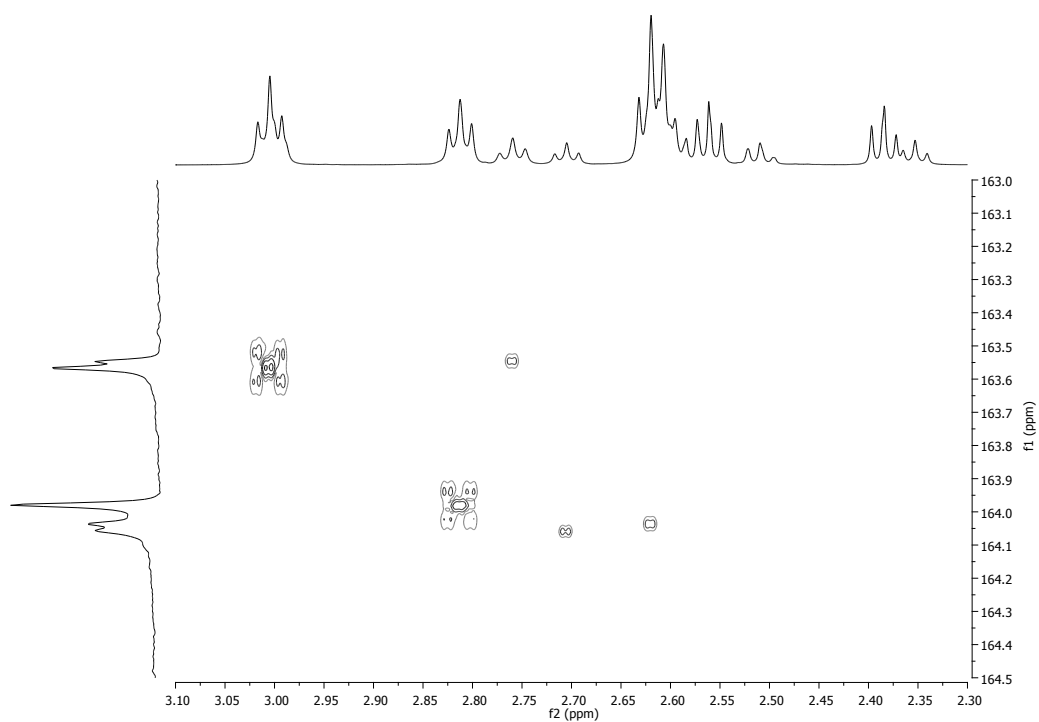



**Figure S6:** View of the low field HMBC NMR spectrum of a 2.5 M solution of DETA in D<sub>2</sub>O purged with CO<sub>2</sub>, refluxed for an hour then cooled down to room temperature under CO<sub>2</sub> atmosphere overnight..

### 2.1.2. 0.5 M in D<sub>2</sub>O

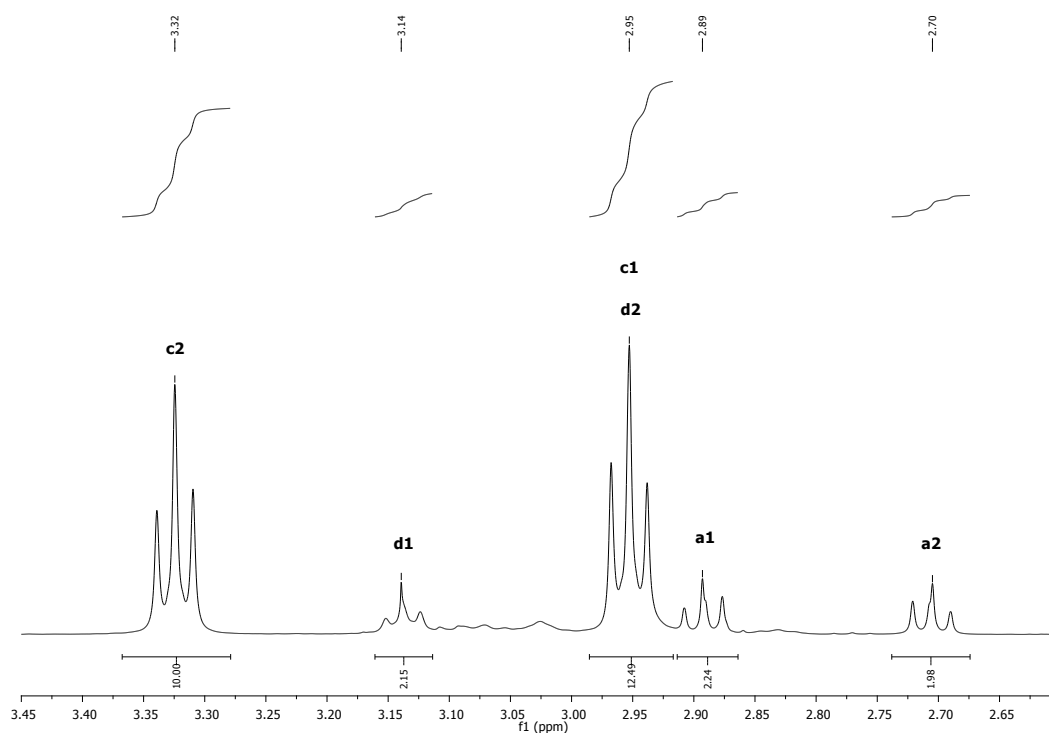

**Figure S7:** <sup>1</sup>H NMR spectrum of a 0.5 M solution of DETA in D<sub>2</sub>O purged with CO<sub>2</sub>, refluxed for an hour then cooled down to room temperature under CO<sub>2</sub> atmosphere overnight

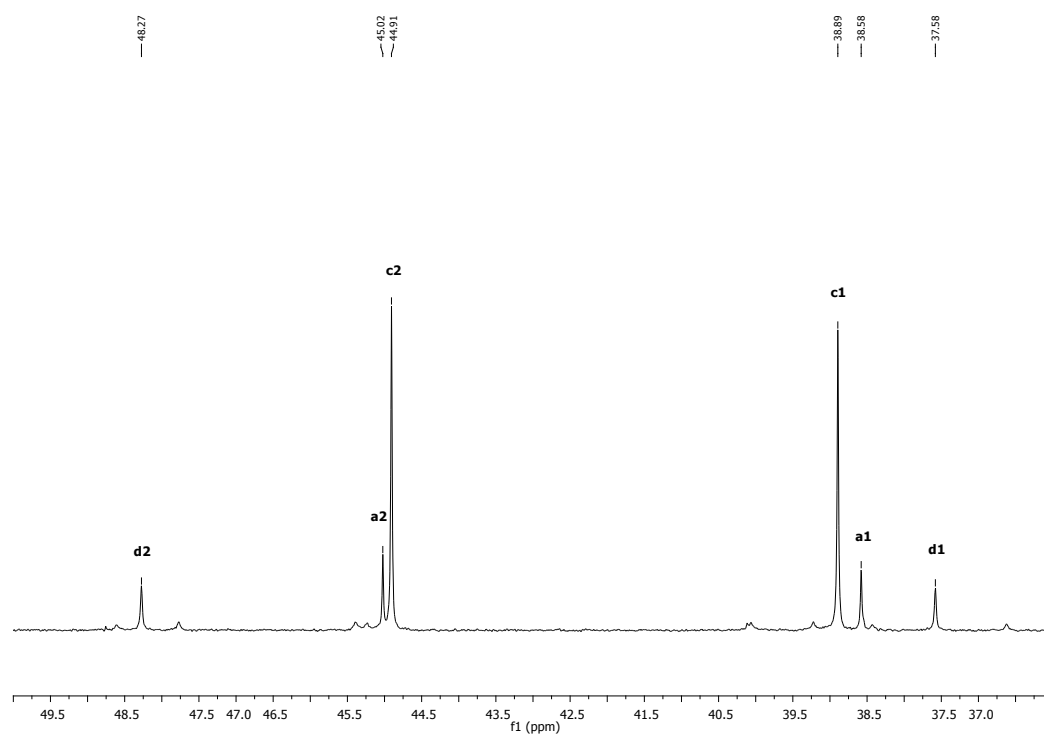

**Figure S8:** High field  $^{13}\text{C}$  NMR spectrum of a 0.5 M solution of DETA in  $\text{D}_2\text{O}$  purged with  $\text{CO}_2$ , refluxed for an hour then cooled down to room temperature under  $\text{CO}_2$  atmosphere overnight.

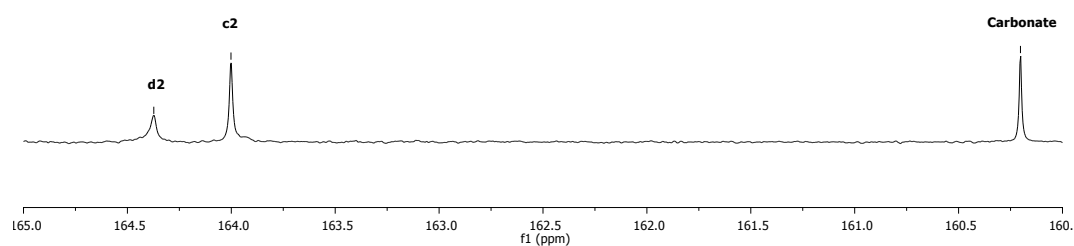

**Figure S8:** Low field  $^{13}\text{C}$  NMR spectrum of a 0.5 M solution of DETA in  $\text{D}_2\text{O}$  purged with  $\text{CO}_2$ , refluxed for an hour then cooled down to room temperature under  $\text{CO}_2$  atmosphere overnight.

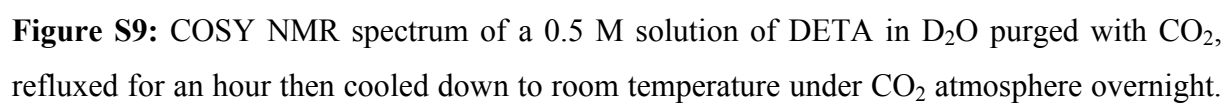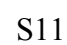

**Figure S10:** HSQC NMR spectrum of a 0.5 M solution of DETA in D<sub>2</sub>O purged with CO<sub>2</sub>, refluxed for an hour then cooled down to room temperature under CO<sub>2</sub> atmosphere overnight.

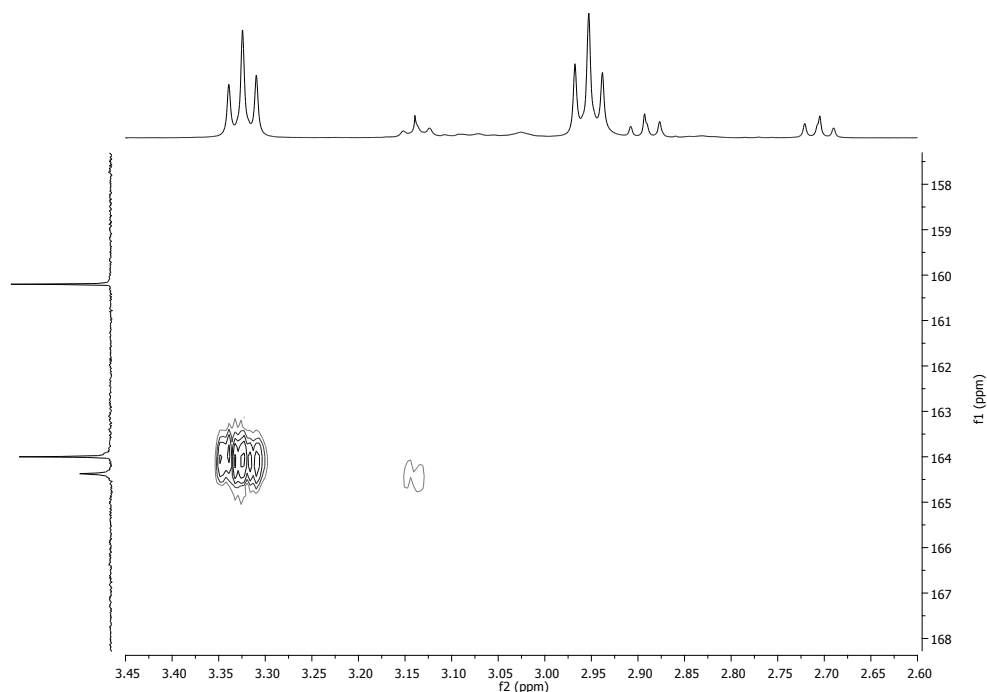

**Figure S11:** Partial view of the low field HMBC NMR spectrum of a 0.5 M solution of DETA in D<sub>2</sub>O purged with CO<sub>2</sub>, refluxed for an hour then cooled down to room temperature under CO<sub>2</sub> atmosphere overnight.

### 2.1.3. 0.5 M in CD<sub>3</sub>OD

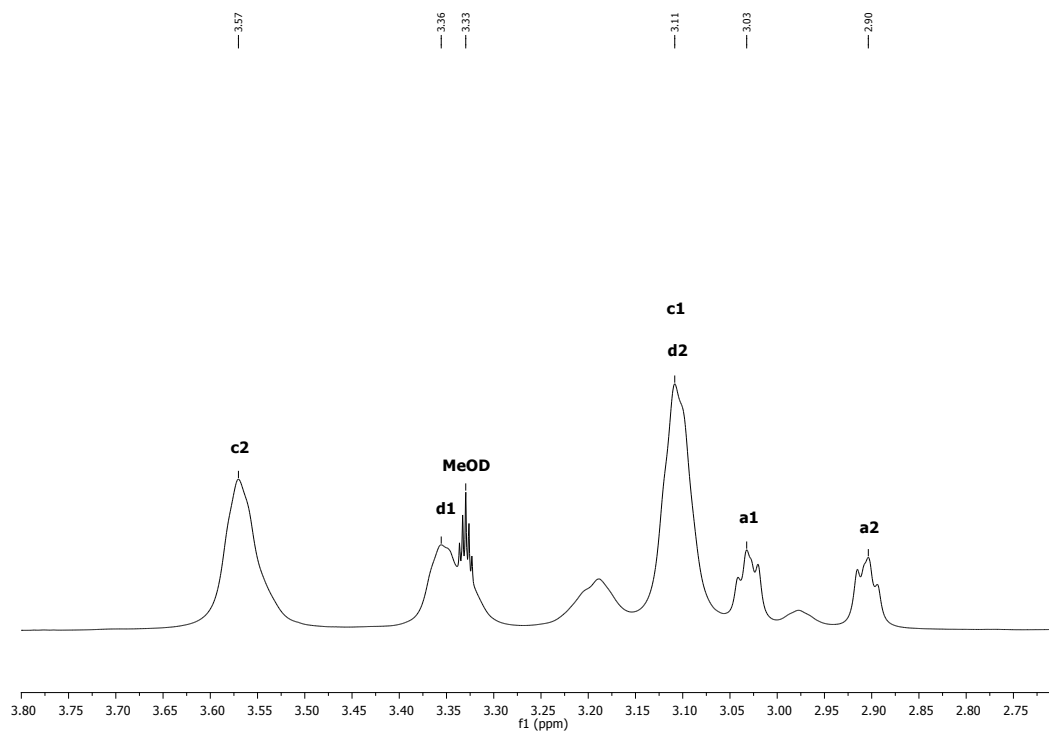

**Figure S12:** <sup>1</sup>H NMR spectrum of a 0.5 M solution of DETA in CD<sub>3</sub>OD purged with CO<sub>2</sub>, refluxed for an hour then cooled down to room temperature under CO<sub>2</sub> atmosphere overnight..

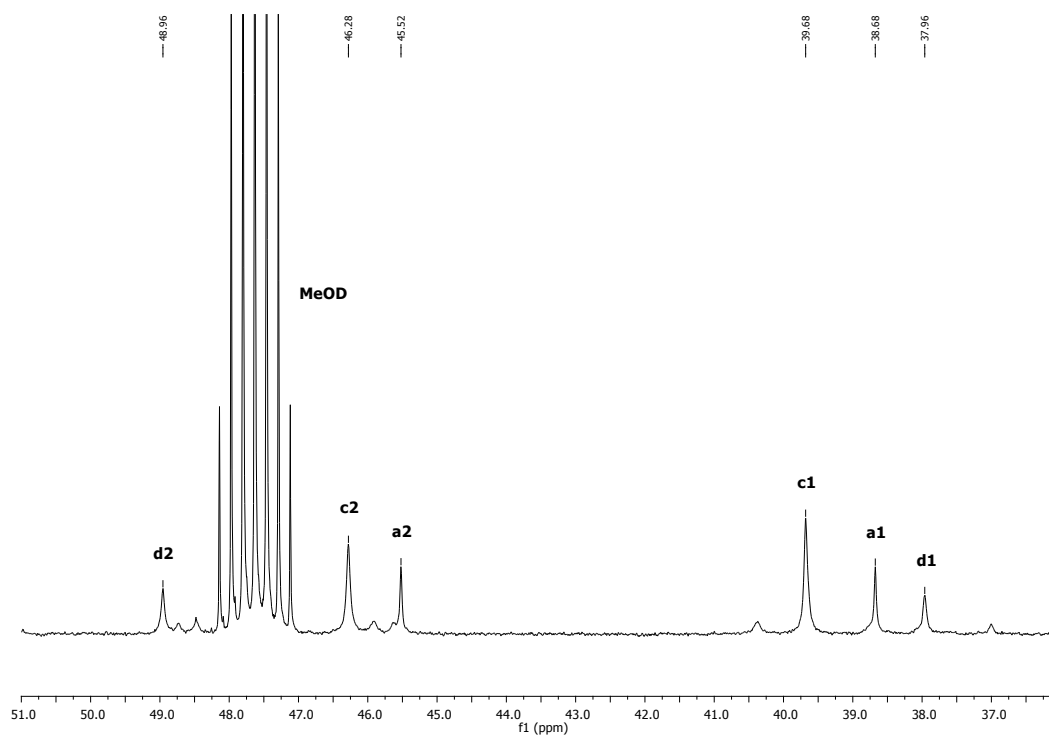

**Figure S13:** High field of  $^{13}\text{C}$  NMR spectrum of a 0.5 M solution of DETA in  $\text{CD}_3\text{OD}$  purged with  $\text{CO}_2$ , refluxed for an hour then cooled down to room temperature under  $\text{CO}_2$  atmosphere overnight.

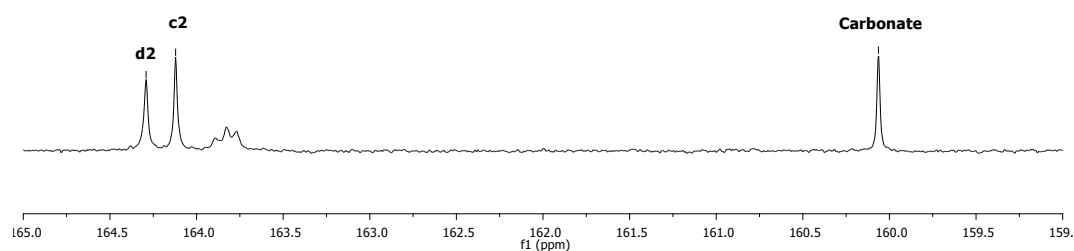

**Figure S14:** Low field of  $^{13}\text{C}$  NMR spectrum of a 0.5 M solution of DETA in  $\text{CD}_3\text{OD}$  purged with  $\text{CO}_2$ , refluxed for an hour then cooled down to room temperature under  $\text{CO}_2$  atmosphere overnight.

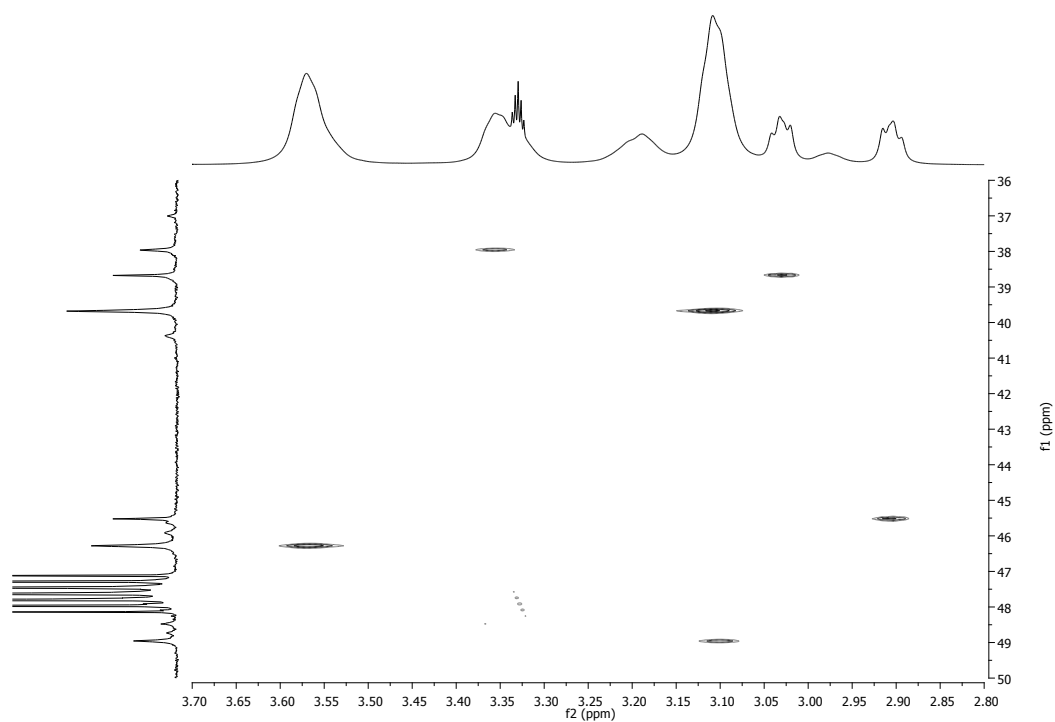

**Figure S15:** HSQC NMR spectrum of a 0.5 M solution of DETA in  $\text{CD}_3\text{OD}$  purged with  $\text{CO}_2$ , refluxed for an hour then cooled down to room temperature under  $\text{CO}_2$  atmosphere overnight.

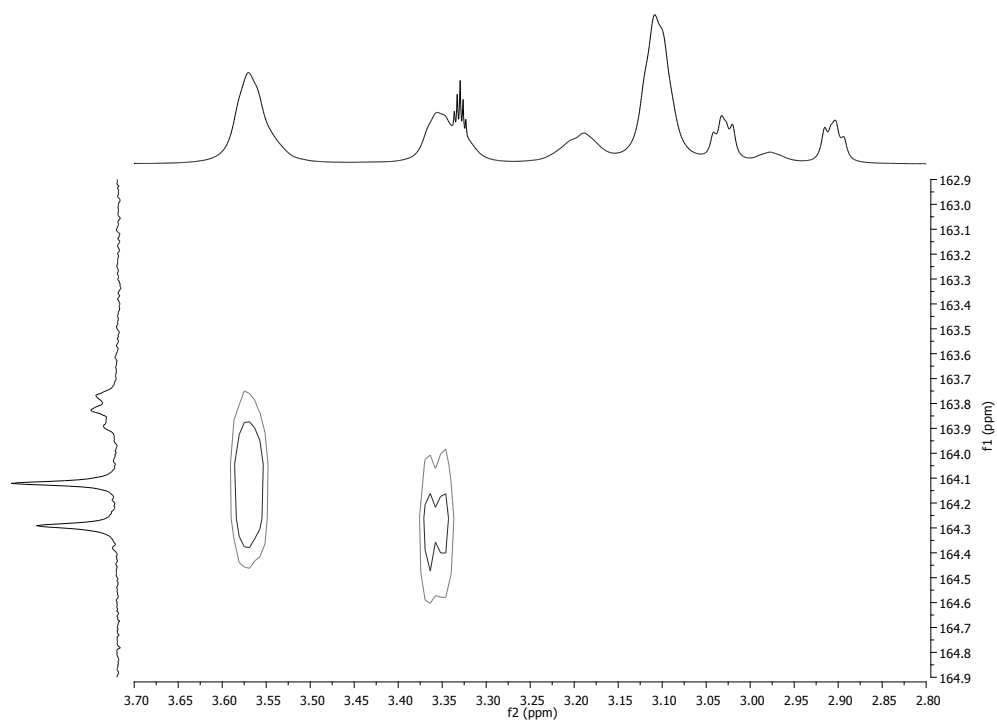

**Figure S16:** Partial view of the low field HMBC NMR spectrum of a 0.5 M solution of DETA in CD<sub>3</sub>OD purged with CO<sub>2</sub>, refluxed for an hour then cooled down to room temperature under CO<sub>2</sub> atmosphere overnight.

## 2.2. Constituent analyses of systems III

### 2.2.1. Monometal systems

#### 2.2.1.1. Influence of the metal

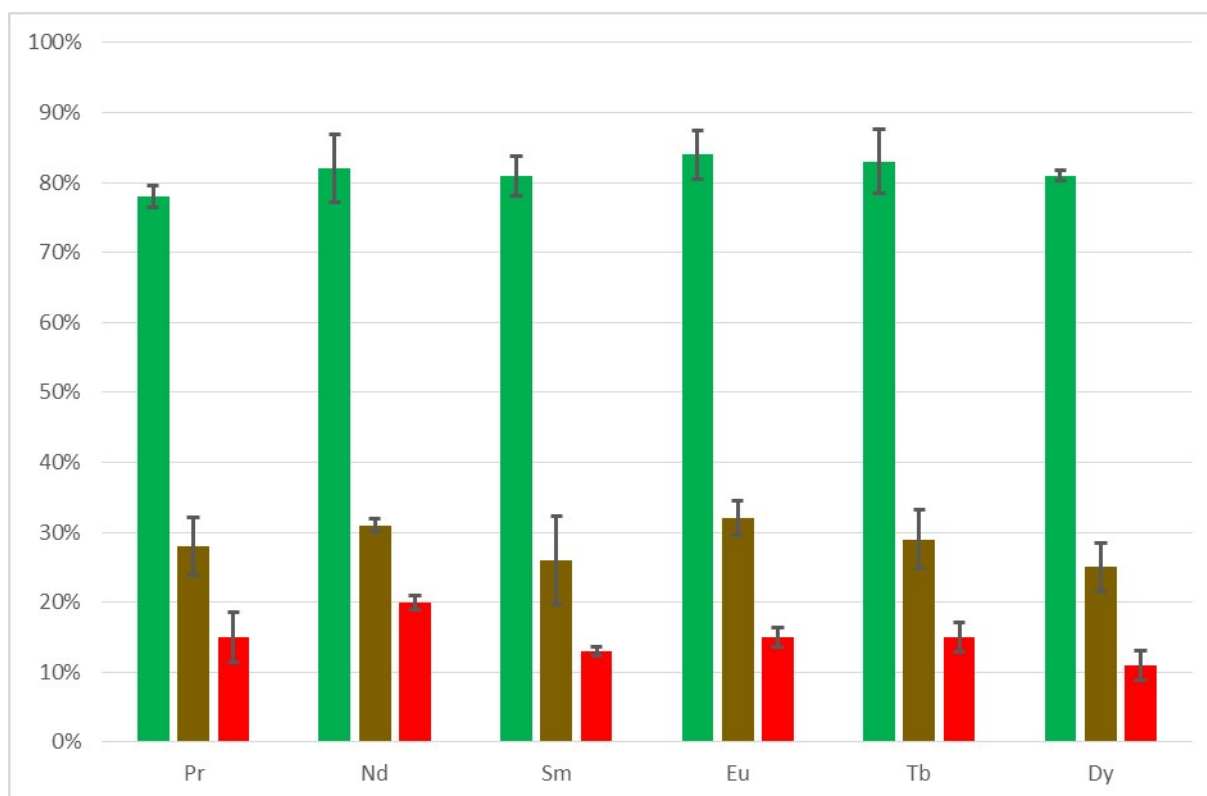

**Figure S17:** Capture efficiency  $E_S$  by CO<sub>2</sub>-induced self-assembling of rare earth metals (green), diethylenetriamine (brown) and trifluoroacetate (red) from methanolic samples ( $c_0 = 0.5$  M,  $x_0 = 1/12$ ).

| M  | $n_s$ (mmol)       |                    |                 |                 | $n_L$ (mmol)       |                 |                 |                    | $L_s$           |                 | $E_S$ (%)          |                 |                 | S(M/X) |
|----|--------------------|--------------------|-----------------|-----------------|--------------------|-----------------|-----------------|--------------------|-----------------|-----------------|--------------------|-----------------|-----------------|--------|
|    | $n_s(\text{CO}_2)$ | $n_s(\text{DETA})$ | $n_s(\text{M})$ | $n_s(\text{X})$ | $n_L(\text{DETA})$ | $n_L(\text{M})$ | $n_L(\text{X})$ | $L_s(\text{CO}_2)$ | $L_s(\text{M})$ | $L_s(\text{X})$ | $E_S(\text{DETA})$ | $E_S(\text{M})$ | $E_S(\text{X})$ |        |
| Pr | 2.22               | 1.39               | 0.33            | .18             | 3.65               | 0.09            | 1.05            | 1.60               | 0.23            | 0.13            | 28                 | 78              | 15              | 21.4   |
| Nd | 2.53               | 1.57               | 0.34            | 0.24            | 3.43               | 0.07            | 0.95            | 1.61               | 0.22            | 0.15            | 31                 | 82              | 20              | 19.2   |
| Sm | 2.08               | 1.32               | 0.31            | 0.16            | 3.79               | 0.07            | 1.01            | 1.58               | 0.24            | 0.12            | 26                 | 81              | 13              | 28.0   |
| Eu | 2.54               | 1.65               | 0.35            | 0.25            | 3.44               | 0.06            | 0.95            | 1.54               | 0.21            | 0.15            | 32                 | 84              | 20              | 22.2   |
| Tb | 2.14               | 1.33               | 0.34            | 0.17            | 3.27               | 0.07            | 1.01            | 1.61               | 0.25            | 0.13            | 29                 | 83              | 15              | 28.9   |
| Dy | 1.97               | 1.19               | 0.30            | 0.12            | 3.62               | 0.07            | 1.03            | 1.66               | 0.25            | 0.10            | 25                 | 81              | 11              | 36.8   |



**Table S1:** Compositional analyses of solid/liquid phases (in mmol) with varying metals ( $n_0(M) = 0.416$  mmol;  $n_0(\text{DETA}) = 5.0$  mmol;  $n_0(X) = 1.25$  mmol)

|    | $P_s(M/\text{CO}_2)$ |     |     |          | $P_s(\text{CO}_2/M)$ |     |     |          | $x_3 = P_s(\text{DETA}/2.\text{CO}_2)$ |     |     |          |
|----|----------------------|-----|-----|----------|----------------------|-----|-----|----------|----------------------------------------|-----|-----|----------|
|    | max                  | min | moy | $\Delta$ | max                  | min | moy | $\Delta$ | max                                    | min | moy | $\Delta$ |
| Pr | 100%                 | 82% | 91% | 18%      | 45%                  | 36% | 41% | 8%       | 80%                                    | 60% | 70% | 20%      |
| Nd | 100%                 | 76% | 88% | 24%      | 40%                  | 31% | 36% | 9%       | 81%                                    | 61% | 71% | 20%      |
| Sm | 100%                 | 83% | 91% | 17%      | 45%                  | 37% | 41% | 8%       | 79%                                    | 58% | 69% | 21%      |
| Eu | 100%                 | 76% | 88% | 24%      | 41%                  | 31% | 36% | 10%      | 77%                                    | 54% | 66% | 23%      |
| Tb | 100%                 | 83% | 92% | 17%      | 48%                  | 40% | 44% | 8%       | 81%                                    | 61% | 71% | 20%      |
| Dy | 100%                 | 87% | 93% | 13%      | 46%                  | 40% | 43% | 6%       | 83%                                    | 66% | 75% | 17%      |

**Table S2:** Building block pairing and carbamate repartition for varying metals ( $n_0(M) = 0.416$  mmol;  $n_0(\text{DETA}) = 5.0$  mmol;  $n_0(X) = 1.25$  mmol)

Details of the calculations:

$$\% P_s(i/j) = \frac{n_s(i/j)}{\sum_k n_s(i/k)}$$

Where  $\% P_s(i/j)$  is the percentage of the building block  $i$  paired with the building block  $j$ .

$$\% P_s(M/X) = \frac{n_s(M/X)}{n_s(M/X) + n_s(M/\text{CO}_2)}$$

In extreme cases, either all trifluoroacetates are paired with metal or none are paired. Giving:

$$\% P_s(M/X)_{\max} = \frac{n_s(X)}{3n_s(M)} \text{ et } \% P_s(M/X)_{\min} = 0$$

$$\% P_s(M/X)_{\text{moy}} = \frac{n_s(X)}{6n_s(M)}$$

Hence:

$$\% P_s(M/\text{CO}_2)_{\min} = 1 - \frac{n_s(X)}{3n_s(M)} \text{ et } \% P_s(M/\text{CO}_2)_{\max} = 1$$

$$\% P_s(M/\text{CO}_2)_{\text{moy}} = 1 - \frac{n_s(X)}{6n_s(M)}$$

Similarly for carbamate – ammonium vs. metal-carbamato pairing:

$$\% P_s(CO_2/M) = \frac{n_s(CO_2/M)}{n_s(CO_2/M) + n_s(CO_2/RR'NH_2)}$$

$$\% P_s(CO_2/M)_{min} = \frac{3n_s(M) - n_s(X)}{n_s(CO_2)} \quad \text{and}$$

$$\% P_s(CO_2/M)_{max} = \frac{3n_s(M)}{n_s(CO_2)}$$

$$\% P_s(CO_2/M)_{moy} = \frac{6n_s(M) - n_s(X)}{2n_s(CO_2)}$$

Regarding the fraction of dicarbamates among the DETA – CO<sub>2</sub> adducts, by definition of the loading in CO<sub>2</sub> is:

$$L_s(CO_2) = \frac{n_2 + 2n_3}{n} = x_2 + 2x_3 = 1 + x_3 - x_1$$

The molar fraction  $x_3$  of dicarbamates **3** with respect to either the molar fraction  $x_1$  of free DETA **1** or  $x_2$  of monocarbamate **2** can be easily be deduced:

$$x_3 = \frac{L_s(CO_2) - x_2}{2} \text{ or } x_3 = L_s(CO_2) - 1 - x_1,$$

providing the maximal (no monocarbamate **2**), minimal (no free DETA **1**) and average values for  $x_3$  respectively :

$$x_{3max} = \frac{L_s(CO_2)}{2}; x_{3min} = L_s(CO_2) - 1$$

$$x_{3moy} = \frac{3L_s(CO_2) - 2}{4}$$

### 2.2.1.2. Influence of the initial metal/DETA stoichiometry $x_0(M)$

| $x_0(M)$ | $n_s$ (mmol) |             |          |          | $n_L$ (mmol) |          |          | $L_s$       |          |          | $E_s(\%)$   |          |          | $S(M/X)$ |
|----------|--------------|-------------|----------|----------|--------------|----------|----------|-------------|----------|----------|-------------|----------|----------|----------|
|          | $n_s(CO_2)$  | $n_s(DETA)$ | $n_s(M)$ | $n_s(X)$ | $n_L(DETA)$  | $n_L(M)$ | $n_L(X)$ | $L_s(CO_2)$ | $L_s(M)$ | $L_s(X)$ | $E_s(DETA)$ | $E_s(M)$ | $E_s(X)$ |          |
| 1/24     | 0.983        | 0.650       | 0.143    | 0.040    | 4.359        | 0.065    | 0.573    | 1.51        | 0.22     | 0.06     | 13          | 69       | 6        | 31.5     |
| 1/12     | 2.324        | 1.543       | 0.353    | 0.220    | 3.412        | 0.071    | 1.036    | 1.51        | 0.23     | 0.14     | 31          | 83       | 12       | 39.5     |
| 1/6      | 1.69         | 1.13        | 0.37     | 0.24     | 1.33         | 0.02     | 0.89     | 1.50        | 0.35     | 0.21     | 46          | 95       | 22       | 68.6     |

|     |      |      |      |      |      |      |      |      |      |      |    |    |    |      |
|-----|------|------|------|------|------|------|------|------|------|------|----|----|----|------|
| 1/3 | 2.37 | 1.29 | 0.78 | 0.31 | 0.90 | 0.05 | 1.07 | 1.83 | 0.60 | 0.24 | 59 | 94 | 23 | 53.8 |
|-----|------|------|------|------|------|------|------|------|------|------|----|----|----|------|

**Table S3:** Compositional analyses of solid/liquid phases (in mmol) with varying initial  $\text{Nd}^{3+}$  /DETA stoichiometries  $x_0(\text{M})$  ( $c_0(\text{DETA}) = 0.5 \text{ mol.L}^{-1}$ )

| $x_0$ | $P_s(\text{M}/\text{CO}_2)$ |     |     |          | $P_s(\text{CO}_2/\text{M})$ |     |     |          | $x_3 = P_s(\text{DETA}/2\text{CO}_2)$ |                   |                   |              |
|-------|-----------------------------|-----|-----|----------|-----------------------------|-----|-----|----------|---------------------------------------|-------------------|-------------------|--------------|
|       | max                         | min | moy | $\Delta$ | max                         | min | moy | $\Delta$ | $x_{3\text{max}}$                     | $x_{3\text{min}}$ | $x_{3\text{moy}}$ | $\Delta x_3$ |
| 1/24  | 100%                        | 91% | 95% | 9%       | 44%                         | 40% | 42% | 4%       | 76%                                   | 51%               | 63%               | 25%          |
| 1/12  | 100%                        | 79% | 90% | 21%      | 46%                         | 36% | 41% | 9%       | 76%                                   | 51%               | 63%               | 25%          |
| 1/6   | 100%                        | 78% | 89% | 22%      | 66%                         | 51% | 59% | 14%      | 75%                                   | 50%               | 63%               | 25%          |
| 1/3   | 100%                        | 87% | 93% | 13%      | 99%                         | 86% | 92% | 13%      | 92%                                   | 83%               | 87%               | 9%           |

**Table S4:** Building block pairing and carbamate repartition for varying initial  $\text{Nd}^{3+}$  /DETA stoichiometries  $x_0(\text{M})$  ( $C_0(\text{DETA}) = 0.5 \text{ mol.L}^{-1}$ )

### 2.2.1.3. Influence of the initial concentration $c_0(\text{DETA})$

| $c_0$ | $N_s$              |                    |                 |          | $n_L$              |                 |          | $L_s$              |                 |          | $ES(\%)$           |                 | $S(\text{M}/X)$ |      |
|-------|--------------------|--------------------|-----------------|----------|--------------------|-----------------|----------|--------------------|-----------------|----------|--------------------|-----------------|-----------------|------|
|       | $n_s(\text{CO}_2)$ | $n_s(\text{DETA})$ | $n_s(\text{M})$ | $n_s(X)$ | $n_L(\text{DETA})$ | $n_L(\text{M})$ | $n_L(X)$ | $L_s(\text{CO}_2)$ | $L_s(\text{M})$ | $L_s(X)$ | $E_s(\text{DETA})$ | $E_s(\text{M})$ | $E_s(X)$        |      |
| 0.05  | 1.30               | 0.73               | 0.40            | 0.01     | 4.17               | 0.02            | 1.34     | 1.79               | 0.54            | 0.02     | 15                 | 96              | 1               | 2376 |
| 0.1   | 1.69               | 0.90               | 0.35            | 0.01     | 3.73               | 0.03            | 0.79     | 1.87               | 0.39            | 0.01     | 20                 | 92              | 2               | 922  |
| 0.25  | 2.27               | 1.28               | 0.32            | 0.11     | 3.82               | 0.06            | 1.05     | 1.78               | 0.25            | 0.08     | 25                 | 84              | 10              | 51   |
| 0.5   | 2.32               | 1.54               | 0.35            | 0.22     | 3.41               | 0.07            | 1.04     | 1.51               | 0.23            | 0.14     | 31                 | 83              | 11              | 39   |
| 1     | 2.12               | 1.39               | 0.28            | 0.26     | 3.18               | 0.09            | 0.89     | 1.50               | 0.33            | 0.22     | 30                 | 75              | 23              | 11   |
| 1.5   | 7.17               | 5.35               | 0.87            | 0.97     | 8.45               | 0.27            | 2.11     | 1.83               | 0.60            | 0.24     | 39                 | 76              | 31              | 7    |

**Table S5:** Compositional analyses of solid/liquid phases (in mmol) with varying initial  $c_0(\text{DETA})$  ( $x_0(\text{M}) = 1/12$ )

| $C_0$ | $P_s(\text{M}/\text{CO}_2)$ |     |      |          | $P_s(\text{CO}_2/\text{M})$ |     |     |          | $x_3 = P_s(\text{DETA}/2\text{CO}_2)$ |                   |                   |              |
|-------|-----------------------------|-----|------|----------|-----------------------------|-----|-----|----------|---------------------------------------|-------------------|-------------------|--------------|
|       | max                         | min | moy  | $\Delta$ | max                         | min | moy | $\Delta$ | $x_{3\text{max}}$                     | $x_{3\text{min}}$ | $x_{3\text{moy}}$ | $\Delta x_3$ |
| 0.05  | 100%                        | 99% | 100% | 1%       | 78%                         | 78% | 78% | 1%       | 90%                                   | 79%               | 84%               | 11%          |

|      |      |     |      |     |     |     |     |     |     |     |     |     |
|------|------|-----|------|-----|-----|-----|-----|-----|-----|-----|-----|-----|
| 0.1  | 100% | 99% | 100% | 1%  | 62% | 62% | 62% | 1%  | 94% | 87% | 90% | 6%  |
| 0.25 | 100% | 89% | 94%  | 11% | 42% | 37% | 40% | 5%  | 89% | 78% | 84% | 11% |
| 0.5  | 100% | 79% | 90%  | 21% | 45% | 36% | 41% | 9%  | 76% | 51% | 63% | 25% |
| 1    | 100% | 69% | 85%  | 31% | 40% | 27% | 33% | 12% | 75% | 50% | 63% | 25% |
| 1.5  | 100% | 63% | 81%  | 37% | 36% | 23% | 30% | 14% | 92% | 83% | 87% | 9%  |

**Table S6:** Building block pairing and carbamate repartition for varying initial  $c_0(\text{DETA})$  ( $x_0(\text{M}) = 1/12$ )

### 2.2.2. Bimetallic systems

| $M_1/M_2$ | $C_0$ | $L_s$              |            |            |          |                    | $E_s(\%)$  |            |          | $S(M_2/M_1)$ |
|-----------|-------|--------------------|------------|------------|----------|--------------------|------------|------------|----------|--------------|
|           |       | $L_s(\text{CO}_2)$ | $L_s(M_1)$ | $L_s(M_2)$ | $L_s(X)$ | $E_s(\text{DETA})$ | $E_s(M_1)$ | $E_s(M_2)$ | $E_s(X)$ |              |
| Fe/Nd     | 0.5M  | 1.57               | 0.10       | 0.35       | 0.02     | 14                 | 20         | 73         | 1        | 22           |
| Fe/Nd     | 0.05M | 1.48               | 0.08       | 0.26       | 0.03     | 25                 | 34         | 90         | 0        | 32           |
| Co/Sm     | 0.5M  | 1.30               | 0.05       | 0.13       | 0.13     | 14                 | 19         | 79         | 7        | 17           |
| Co/Sm     | 0.05M | 1.37               | 0.02       | 0.10       | 0.10     | 6                  | 2          | 0.71       | 1        | 106          |

**Table S7:** Compositional analyses of solid/liquid phases (in mmol) with varying initial  $c_0(\text{DETA})$  and bimetallic system ( $x_0(M_1+M_2) = 1/12$ )

| $M_1/M_2$ | $C_0$ | $P_s(M/\text{CO}_2)$ |     |      |          | $P_s(\text{CO}_2/M)$ |     |     |          | $x_3 = P_s(\text{DETA}/2\text{CO}_2)$ |                   |                   |              |
|-----------|-------|----------------------|-----|------|----------|----------------------|-----|-----|----------|---------------------------------------|-------------------|-------------------|--------------|
|           |       | max                  | min | moy  | $\Delta$ | max                  | min | moy | $\Delta$ | $x_{3\text{max}}$                     | $x_{3\text{min}}$ | $x_{3\text{moy}}$ | $\Delta x_3$ |
| Fe/Nd     | 0.5M  | 100%                 | 99% | 100% | 1%       | 78%                  | 78% | 78% | 1%       | 81%                                   | 61%               | 71%               | 20%          |
| Fe/Nd     | 0.05M | 100%                 | 98% | 99%  | 2%       | 91%                  | 89% | 90% | 2%       | 76%                                   | 52%               | 64%               | 24%          |
| Co/Sm     | 0.5M  | 100%                 | 76% | 88%  | 24%      | 42%                  | 32% | 37% | 10%      | 76%                                   | 51%               | 63%               | 25%          |
| Co/Sm     | 0.05  | 100%                 | 72% | 86%  | 28%      | 26%                  | 19% | 23% | 7%       | 76%                                   | 51%               | 63%               | 25%          |

**Table S8:** Building block pairing and carbamate repartition for varying initial  $c_0(\text{DETA})$  and bimetallic system ( $x_0(M_1+M_2) = 1/12$ )

## References

- (1) C. Rüssel, *J. Non-Cryst. Solids*, 1993, **152**, 161-166
- (2) N. Iranpoor and H. Adibi, *Bull. Chem. Soc. Jpn.*, 2000, **73**, 675-680
- (3) M. J. Baillie, D. H. Brown, K. C. Moss and D. W. A. Sharp, *J. Chem. Soc. A*, 1968, 3110-3114
- (4) B. Vitorge, S. Bieri, M. Humam, P. Christen, K. Hostettmann, O. Muñoz, S. Loss and D. Jeannerat, *Chem. Commun.* 2009, 950.
